# Supplementary material
Source: PubMed Central journal article supplement (PMC4902626)
Supplement: supp_pp.16.00458_PP2016-00458DR1_Supplemental_Figure_2.pdf [file supp_pp.16.00458_PP2016-00458DR1_Supplemental_Figure_2.pdf]

A

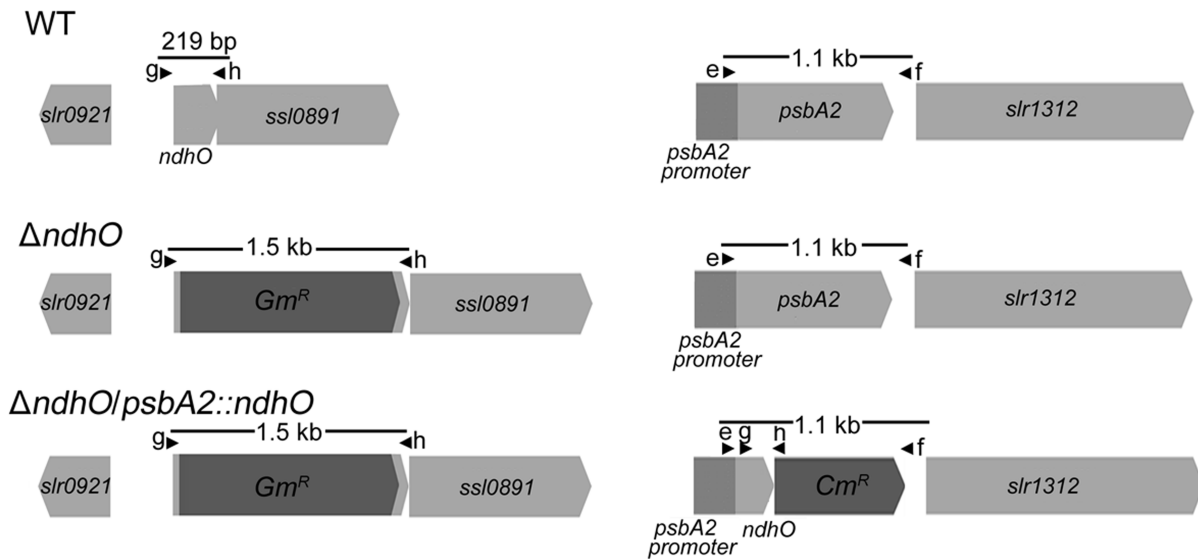

B

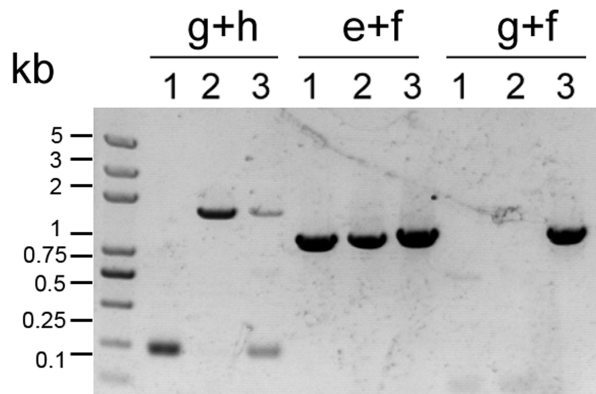

C

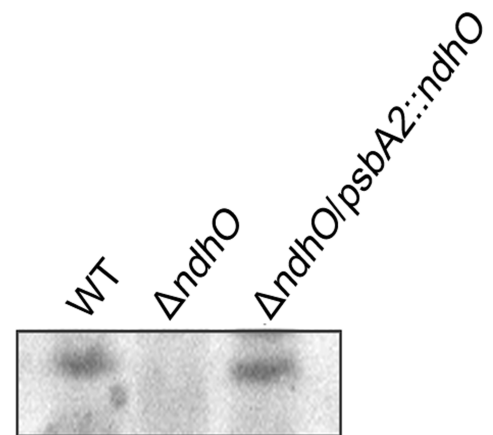

Supplemental Figure 2. Construction and verification of the complemented *ndhO* strain. A, Construction of the plasmid used to generate the  $\Delta ndhO/psbA2::ndhO$ . B, PCR segregation analysis of the  $\Delta ndhO/psbA2::ndhO$  mutant using the primers listed in Supplemental Table S1. Primers location is shown in A, and the expected DNA fragment size is based on the DNA template. 1: wild type (WT); 2:  $\Delta ndhO$ ; 3:  $\Delta ndhO/psbA2::ndhO$ . C, Immunoblot analysis of NdhO in thylakoid membranes using antibody against NdhO in WT,  $\Delta ndhO$ , and  $\Delta ndhO/psbA2::ndhO$ . Each lane was loaded with thylakoid membrane proteins corresponding to 2  $\mu$ g chlorophyll a.
