# Supplementary material
Source: PubMed Central journal article supplement (PMC4902626)
Supplement: supp_pp.16.00458_PP2016-00458DR1_Supplemental_Figure_3.pdf [file supp_pp.16.00458_PP2016-00458DR1_Supplemental_Figure_3.pdf]

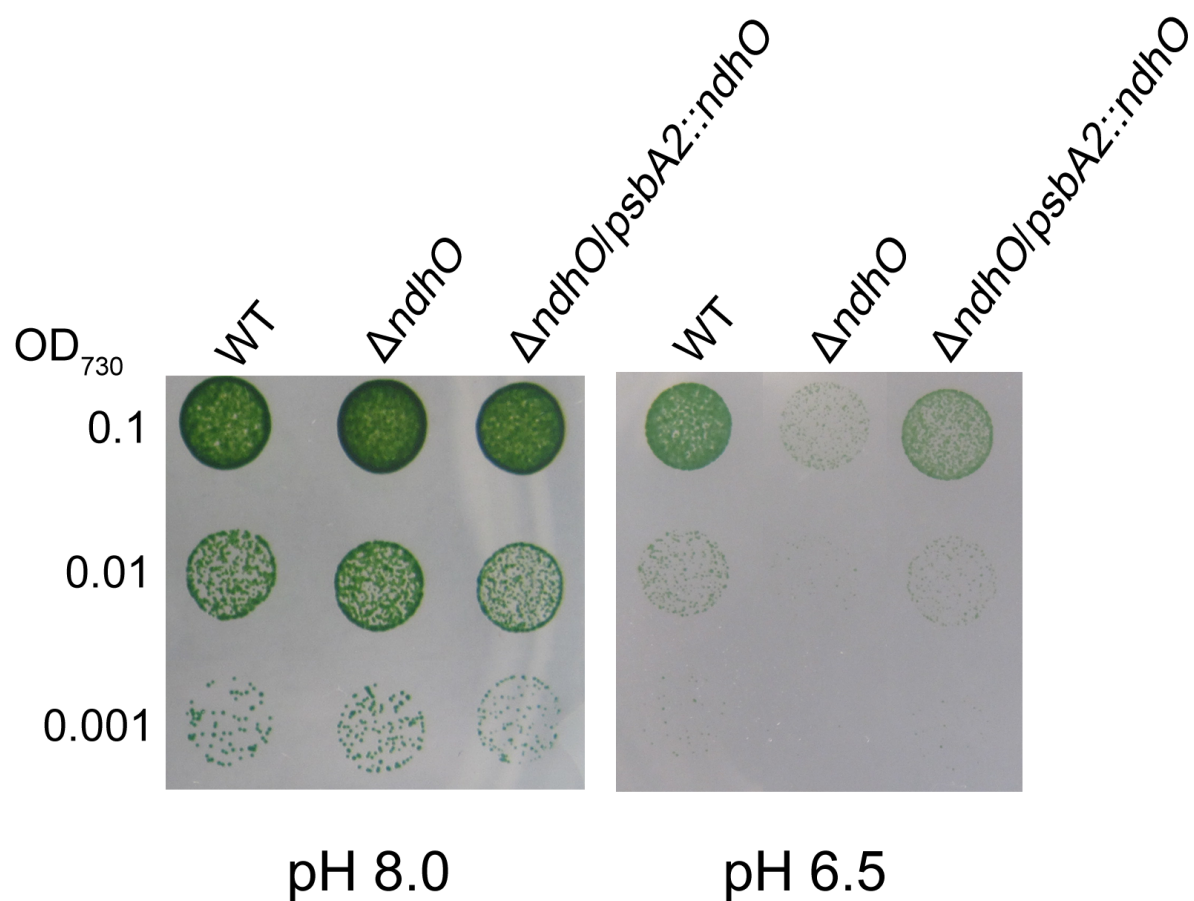

Supplemental Figure 3. Growth of the wild type (WT), *ndhO* deletion mutant and complemented *ndhO* strains in air.

The concentration of the cells was adjusted to  $OD_{730}=0.1, 0.01,$  and  $0.001$ .  $3 \mu\text{l}$  of the cell suspensions were placed on the agar plates buffered at pH 8.0 and pH 6.5. The cultures were grown for 6 days at  $40 \mu\text{mol photons m}^{-2} \text{s}^{-1}$ .
