# Supplementary material
Source: PubMed Central journal article supplement (PMC4902626)
Supplement: supp_pp.16.00458_PP2016-00458DR1_Supplemental_Table_1.pdf [file supp_pp.16.00458_PP2016-00458DR1_Supplemental_Table_1.pdf]

1 **Supplemental Table 1**

2 **Primers List and Sequence**

3 **Primers used to construct the mutant strains**

| Name             | Sequence (5'-3')                    | Description                                            |
|------------------|-------------------------------------|--------------------------------------------------------|
| <i>ndhN</i> Up-F | CCGGAATTCGGCTAAAGAGAAGGAAATTGAAATG  | Amplification of upstream region<br>of <i>ndhN</i>     |
| <i>ndhN</i> Up-R | CGGGGTACCCAATTAATGGCAATGGCAACAT     |                                                        |
| <i>ndhN</i> Dn-F | CGCGGATCCTGCTTGCAGGCGGCCTAG         | Amplification of downstream<br>region of <i>ndhN</i>   |
| <i>ndhN</i> Dn-R | CCCAAGCTTATTAGATGCTGAGAATCGGCC      |                                                        |
| <i>ndhH</i> Up-F | CCGGAATTCACTTGAATAAAGGGAAGGGAAAGG   | Amplification of upstream region<br>of <i>ndhH</i>     |
| <i>ndhH</i> Up-R | CGGGGTACCTACTGGGCCCGCTTAGGAAC       |                                                        |
| <i>ndhH</i> Dn-F | CGCGGATCCGGGAAATGCGGGAGTCGG         | Amplification of downstream<br>region of <i>ndhH</i>   |
| <i>ndhH</i> Dn-R | CCCAAGCTTTTACTGGGCGGTTGCACAAC       |                                                        |
| <i>ndhJ</i> Up-F | CCGGAATTCGGCAAGCGGATTTGATTATC       | Amplification of upstream region<br>of <i>ndhJ</i>     |
| <i>ndhJ</i> Up-R | TCCGAGCTCCAAAGCCATTGGTGGTCAGC       |                                                        |
| <i>ndhJ</i> Dn-F | CGCGGATCCAAGGTCACCCCAATTTGAAACG     | Amplification of downstream<br>region of <i>ndhJ</i>   |
| <i>ndhJ</i> Dn-R | CCCAAGCTTATAAATTGTTGCTCTGCCACC      |                                                        |
| <i>ndhO</i> Up-F | TCCGAGCTCAAAGTTCCAGATAGACCCGGG      | Amplification of upstream region<br>of <i>ndhO</i>     |
| <i>ndhO</i> Up-R | CGGGGTACCACTGCCCTTTTTCATTTAGCG      |                                                        |
| <i>ndhO</i> Dn-F | CGCGGATCCTAGACCAAATCGAAGCCCTGG      | Amplification of downstream<br>region of <i>ndhO</i>   |
| <i>ndhO</i> Dn-R | CCCAAGCTTAATAGGCTGTGCCCGTTGTAG      |                                                        |
| <i>ndhM</i> -F   | GGGAATTCATATGCTTGTAAATCCACTACCCG    | Amplification of <i>ndhM</i><br>encoding gene fragment |
| <i>ndhM</i> -R   | CGCGGATCCTTAGTTATCCAGCCAATATTTTCCTG |                                                        |
| Primer a         | CCCGGACAAATTTGTTTAGAATTACT          | Segregation analysis                                   |
| Primer b         | CTCCCTCCAGTTATGGTCAATTGA            |                                                        |
| Primer c         | ATGTTGCCATTGCCATTAATTG              | Segregation analysis                                   |
| Primer d         | CTAGGCCGCCTGCAAGCA                  |                                                        |
| Primer e         | GACAAATACATAAGG AATTATAACC          | Segregation analysis                                   |
| Primer f         | CACAACGTGGCTTTCCCGGATCC             |                                                        |
| Primer g         | ATGGCCGCTAAAATGAAAAAG               | Segregation analysis                                   |

|          |                          |                      |
|----------|--------------------------|----------------------|
| Primer h | CTAAGCCAGGGCTTCGATTTG    |                      |
| Primer i | ATGACCAAGATTGAAACCAGAACC | Segregation analysis |
| Primer j | CTAGCGGTCCACCGATCCC      |                      |
| Primer k | GTGGCTGAGGAAGTGA ACTCCC  | Segregation analysis |
| Primer l | CTAATAGGCATCCTGGAGTTCGT  |                      |

4

5 **Primers used to construct vectors to express proteins to raise NdhN, NdhO and NdhJ**

6 **antibodies.**

| Name              | Sequence (5'-3')                     | Description   |
|-------------------|--------------------------------------|---------------|
| <i>ndhN</i> -NdeF | GGAATTCCATATGTTGCCATTGCCATTAATTG     | NdhN antibody |
| <i>ndhN</i> -BamR | CGCGGATCCCTAGGCCGCCTGCAAGCA          |               |
| <i>ndhJ</i> -NdeF | GGAATTCCATATGGTGGCTGAGGAAGTGA ACTCCC | NdhJ antibody |
| <i>ndhJ</i> -BamR | CGCGGATCCCTAATAGGCATCCTGGAGTTCGT     |               |
| <i>ndhO</i> -NdeF | GGAATTCCATATGGCCGCTAAAATGAAAAAG      | NdhO antibody |
| <i>ndhO</i> -BamR | CGCGGATCCCTAAGCCAGGGCTTCGATTTG       |               |

7

8 **Primers used to construct fusion protein expression vector**

| Name              | Sequence (5'-3')                        | Description                   |
|-------------------|-----------------------------------------|-------------------------------|
| <i>ndhN</i> -EcoF | CCGGAATTCATGTTGCCATTGCCATTAATTG         | GST-tagged NdhN               |
| <i>ndhN</i> -SalR | ACGCGTCGACCTAGGCCGCCTGCAAGC             |                               |
| <i>ndhO</i> -EcoF | CCGGAATTCATGGCCGCTAAAATGAAAAAG          | GST-tagged NdhO               |
| <i>ndhO</i> -SalR | ACGCGTCGACCTAAGCCAGGGCTTCGATTTG         |                               |
| <i>ndhH</i> -F    | GGAATTCCATATGACCAAGATTGAAACCAGAACC      | His <sub>6</sub> -tagged NdhH |
| <i>ndhH</i> -R    | CGCGGATCCCTAGCGGTCCACCGATCCC            |                               |
| <i>ndhI</i> -F    | GGAATTCCATATGTTTAAACAACATTCTCAAACAGGTAG | His <sub>6</sub> -tagged NdhI |
| <i>ndhI</i> -R    | CGCGGATCCCTATTCTGCTTTCACCAAATCTTCG      |                               |
| <i>ndhJ</i> -F    | GGAATTCCATATGGTGGCTGAGGAAGTGA ACTCCC    | His <sub>6</sub> -tagged NdhJ |
| <i>ndhJ</i> -R    | CGCGGATCCCTAATAGGCATCCTGGAGTTCGT        |                               |
| <i>ndhK</i> -F    | GGAATTCCATATGAGTCCCAACCCTGCTAACC        | His <sub>6</sub> -tagged NdhK |

---

|                |                                     |                               |
|----------------|-------------------------------------|-------------------------------|
| <i>ndhK</i> -R | CCGGAATTCTCAGCCACGGTTTAATTGCTC      |                               |
| <i>ndhM</i> -F | GGGAATTCCATATGCTTGTTAAATCCACTACCCG  | His <sub>6</sub> -tagged NdhM |
| <i>ndhM</i> -R | CGCGGATCCTTAGTTATCCAGCCAATATTTTCCTG |                               |
| <i>ndhO</i> -F | GGGAATTCCATATGGCCGCTAAAATGAAAAAG    | His <sub>6</sub> -tagged NdhO |
| <i>ndhO</i> -R | CGCGGATCCCTAAGCCAGGGCTTCGATTTG      |                               |
| <i>ndhS</i> -F | GGGAATTCCATATGATTTTTCCCGGTGCAAC     | His <sub>6</sub> -tagged NdhS |
| <i>ndhS</i> -R | CGCGGATCCCTAGATGGGTTTGACTGCTTCC     |                               |

9
